# Supplementary material
Source: ML conference proceedings conference paper supplement (https://proceedings.mlr.press/v129/verma20a.html)
Supplement: Supplementary file [file verma20a-supp.pdf]

## Supplementary Material for ‘Thompson Sampling for Unsupervised Sequential Selection’

### Appendix A. Useful results needed to prove regret bounds of **USS-TS**

We use the following results in our proofs.

**Fact 2** (Chernoff bound for Bernoulli distributed random variables). *Let  $X_1, \dots, X_n$  be i.i.d. Bernoulli distributed random variables. Let  $\hat{\mu}_n = \frac{1}{n} \sum_{i=1}^n X_i$  and  $\mu = \mathbb{E}[X_i]$ . Then, for any  $\varepsilon \in (0, 1 - \mu)$ ,*

$$\mathbb{P}\{\hat{\mu}_n \geq \mu + \varepsilon\} \leq \exp(-d(\mu + \varepsilon, \mu)n),$$

and, for any  $\varepsilon \in (0, \mu)$ ,

$$\mathbb{P}\{\hat{\mu}_n \leq \mu - \varepsilon\} \leq \exp(-d(\mu - \varepsilon, \mu)n),$$

where  $d(x, \mu) = x \log\left(\frac{x}{\mu}\right) + (1-x) \log\left(\frac{1-x}{1-\mu}\right)$ .

See Section 10.1 of Chapter 10 of book ‘Bandit Algorithms’ (Lattimore and Szepesvári, 2020) for proof.

**Fact 3** (Pinsker’s Inequality for Bernoulli distributed random variables). *For  $p, q \in (0, 1)$ , the KL divergence between two Bernoulli distributions is bounded as:*

$$d(p, q) \geq 2(p - q)^2.$$

**Fact 4.** *Let  $x > 0$  and  $D > 0$ . Then, for any  $a \in (0, 1)$ ,*

$$\frac{1}{\exp^{Dx} - 1} \leq \begin{cases} \frac{\exp^{-Dx}}{1-a} & (x \geq \ln(1/a)/D) \\ \frac{1}{Dx} & (x < \ln(1/a)/D). \end{cases}$$

Further, we have,

$$\sum_{x=1}^n \frac{1}{\exp^{Dx} - 1} \leq \Theta\left(\frac{1}{D^2} + \frac{1}{D}\right).$$

*Proof.* Using  $\exp^y \geq y+1$  (by Taylor Series expansion), we have  $\frac{1}{\exp^{Dx} - 1} \leq \frac{1}{Dx}$  as  $\exp^{Dx} - 1 \geq Dx$ . We can re-write,  $\frac{1}{\exp^{Dx} - 1} = \frac{\exp^{-Dx}}{1 - \exp^{-Dx}}$ . Since  $\exp^{-Dx}$  is strictly decreasing function for all  $Dx > 0$ , it is easy to check that  $\exp^{-Dx} \leq a$  holds for any  $x \geq \ln(1/a)/D$  and  $a \in (0, 1)$ . Hence,  $\frac{\exp^{-Dx}}{1 - \exp^{-Dx}} \leq \frac{\exp^{-Dx}}{1-a}$  for all  $x \geq \ln(1/a)/D$ .

Now we will prove the second part,

$$\sum_{x=1}^n \frac{1}{\exp^{Dx} - 1} \leq \frac{\ln(1/a)}{D^2} + \sum_{x \geq \ln(1/a)/D}^n \frac{\exp^{-Dx}}{1-a}$$

$$\begin{aligned}
 &\leq \frac{\ln(1/a)}{D^2} + \frac{1}{(1-a)} \int_{x=0}^{\infty} \exp^{-Dx} dx \\
 &= \frac{\ln(1/a)}{D^2} + \frac{1}{(1-a)} \left( \frac{\exp^{-Dx}}{-D} \right) \Big|_{x=0}^{\infty} \\
 &= \frac{\ln(1/a)}{D^2} + \frac{1}{(1-a)} \left( 0 - \frac{\exp^0}{-D} \right) \\
 &= \frac{\ln(1/a)}{D^2} + \frac{1}{(1-a)D} \\
 \implies \sum_{x=1}^n \frac{1}{\exp^{Dx} - 1} &\leq \Theta \left( \frac{1}{D^2} + \frac{1}{D} \right). \quad \square
 \end{aligned}$$

**Fact 5.** Let  $\varepsilon \in (0, 1)$  and  $0 < x < y < z < 1$ . If  $d(y, z) = d(x, z)/(1 + \varepsilon)$  then

$$y - x \geq \frac{\varepsilon}{1 + \varepsilon} \cdot \frac{d(x, z)}{\ln \left( \frac{z(1-x)}{x(1-z)} \right)}.$$

*Proof.* By definition

$$\begin{aligned}
 d(p, q) &= p \ln \frac{p}{q} + (1-p) \ln \left( \frac{1-p}{1-q} \right) \\
 &= \ln \left( \left( \frac{p}{q} \right)^p \left( \frac{1-p}{1-q} \right)^{1-p} \right) \\
 &= \ln \left( \left( \frac{q(1-p)}{p(1-q)} \right)^{-p} \right) + \ln \left( \frac{1-p}{1-q} \right) \\
 \implies d(p, q) &= -p \ln \left( \frac{q(1-p)}{p(1-q)} \right) + \ln \left( \frac{1-p}{1-q} \right).
 \end{aligned}$$

Set  $l(p, q) = \ln \left( \frac{q(1-p)}{p(1-q)} \right)$ . Note that  $l(p, \cdot)$  is a strictly decreasing function of  $p$  and positive for all  $p < q$ . We can re-arrange above equation as

$$p \cdot l(p, q) = -d(p, q) + \ln \left( \frac{1-p}{1-q} \right).$$

Using above equation, we have

$$y \cdot l(y, z) - x \cdot l(x, z) = -d(y, z) + \ln \left( \frac{1-y}{1-z} \right) + d(x, z) - \ln \left( \frac{1-x}{1-z} \right).$$

Using  $d(y, z) = d(x, z)/(1 + \varepsilon)$ ,

$$y \cdot l(y, z) - x \cdot l(x, z) = \frac{\varepsilon}{1 + \varepsilon} d(x, z) + \ln \left( \frac{1-y}{1-x} \right).$$

After adding  $y(l(x, z) - l(y, z))$  both side, we have

$$(y-x)l(x, z) = \frac{\varepsilon}{1 + \varepsilon} d(x, z) + \ln \left( \frac{1-y}{1-x} \right) + y(l(x, z) - l(y, z)).$$

$$\begin{aligned}
 \text{Using } l(x, z) &= \ln\left(\frac{z(1-x)}{x(1-z)}\right) \text{ and } l(y, z) = \ln\left(\frac{z(1-y)}{y(1-z)}\right) \\
 &= \frac{\varepsilon}{1+\varepsilon}d(x, z) + \ln\left(\frac{1-y}{1-x}\right) + y \ln\left(\frac{y(1-x)}{x(1-y)}\right) \\
 &= \frac{\varepsilon}{1+\varepsilon}d(x, z) + \ln\left(\left(\frac{y(1-x)}{x(1-y)}\right)^y \cdot \frac{1-y}{1-x}\right) \\
 &= \frac{\varepsilon}{1+\varepsilon}d(x, z) + \ln\left(\left(\frac{y}{x}\right)^y \left(\frac{1-y}{1-x}\right)^{1-y}\right) \\
 &= \frac{\varepsilon}{1+\varepsilon}d(x, z) + d(y, x)
 \end{aligned}$$

As  $d(p, q) \geq 0$  and dividing both side by  $l(x, z)$ ,

$$\implies y - x \geq \frac{\varepsilon}{1+\varepsilon} \cdot \frac{d(x, z)}{l(x, z)}.$$

Substituting value of  $l(x, z)$  in the above equation, we get

$$y - x \geq \frac{\varepsilon}{1+\varepsilon} \cdot \frac{d(x, z)}{\ln\left(\frac{z(1-x)}{x(1-z)}\right)}. \quad \square$$

## Appendix B. Leftover proofs from Section 4

**Lemma 4.** *Let  $P \in \mathcal{P}_{\text{WD}}$  and satisfies the transitivity property. If  $s$  be the number of times the sub-optimal arm  $j$  is selected by **USS-TS** then, for any  $j < i^*$ ,*

$$\sum_{t=1}^T \mathbb{P}\{I_t = j, j < i^*\} \leq \frac{24}{\xi_j^2} + \sum_{s \geq 8/\xi_j} \Theta\left(\exp^{-s\xi_j^2/2} + \frac{\exp^{-sd(p_{i^*j} - \xi_j, p_{i^*j})}}{(s+1)\xi_j^2} + \frac{1}{\exp^{s\xi_j^2/4} - 1}\right).$$

*Proof.* Applying Lemma 3 and properties of conditional expectations, we have

$$\sum_{t=1}^T \mathbb{P}\{I_t = j, j < i^*\} = \sum_{t=1}^T \mathbb{E}[\mathbb{P}\{I_t = j, j < i^* | \mathcal{H}_t\}].$$

As  $q_{j,t}$  is fixed given  $\mathcal{H}_t$ ,

$$\begin{aligned}
 \implies \sum_{t=1}^T \mathbb{P}\{I_t = j, j < i^*\} &\leq \sum_{t=1}^T \mathbb{E}\left[\frac{(1-q_{j,t})}{q_{j,t}} \mathbb{P}\{I_t \geq i^* | \mathcal{H}_t\}\right] \\
 &\leq \sum_{t=1}^T \mathbb{E}\left[\mathbb{E}\left[\frac{(1-q_{j,t})}{q_{j,t}} \mathbb{1}_{\{I_t \geq i^*\}} | \mathcal{H}_t\}\right]\right].
 \end{aligned}$$

Using law of iterated expectations,

$$\implies \sum_{t=1}^T \mathbb{P}\{I_t = j, j < i^*\} \leq \sum_{t=1}^T \mathbb{E}\left[\frac{(1-q_{j,t})}{q_{j,t}} \mathbb{1}_{\{I_t \geq i^*\}}\right]. \quad (14)$$

Let  $s_m$  denote the time step at which the output of arm  $i^*$  is observed for the  $m^{\text{th}}$  time for  $m \geq 1$ , and let  $s_0 = 0$ . For  $j < i^*$ , whenever the output from arm  $i^*$  is observed then the output from arm  $j$  is also observed due to the cascade structure. Note that  $q_{j,t} = \mathbb{P} \left\{ \hat{p}_{i^*j}^{(t)} > p_{i^*j} - \xi_j | \mathcal{H}_t \right\}$  changes only when the distribution of  $\hat{p}_{i^*j}^{(t)}$  changes, that is, only on the time step when the feedback from arms  $i^*$  and  $j$  are observed. It only happens when selected arm  $I_t \geq i^*$ . Hence,  $q_{j,t}$  is the same at all time steps  $t \in \{s_m + 1, \dots, s_{m+1}\}$  for every  $m$ . Using this fact, we can decompose the right hand side term in Eq. (14) as follows,

$$\begin{aligned} \sum_{t=1}^T \mathbb{E} \left[ \frac{(1 - q_{j,t})}{q_{j,t}} \mathbb{1}_{\{I_t \geq i^*\}} \right] &= \sum_{m=0}^{T-1} \mathbb{E} \left[ \frac{(1 - q_{j,s_m+1})}{q_{j,s_m+1}} \sum_{t=s_m+1}^{s_{m+1}} \mathbb{1}_{\{I_t \geq i^*\}} \right] \\ &\leq \sum_{m=0}^{T-1} \mathbb{E} \left[ \frac{(1 - q_{j,s_m+1})}{q_{j,s_m+1}} \right] \\ &= \sum_{k=0}^{T-1} \mathbb{E} \left[ \frac{1}{q_{j,s_m+1}} - 1 \right]. \end{aligned}$$

Using above bound in Eq. (14), we get

$$\sum_{t=1}^T \mathbb{P} \{I_t = j, j < i^*\} \leq \sum_{m=0}^{T-1} \mathbb{E} \left[ \frac{1}{q_{j,s_m+1}} - 1 \right].$$

Substituting the bound from Lemma 2 with  $\mu = p_{i^*j}$ ,  $x = p_{i^*j} - \xi_j$ ,  $\Delta(x) = \xi_j$ , and  $q_n(x) = q_{j,s_m}$ , we obtain the following bound,

$$\sum_{t=1}^T \mathbb{P} \{I_t = j, j < i^*\} \leq \frac{24}{\xi_j^2} + \sum_{s \geq 8/\xi_j} \Theta \left( \exp^{-s\xi_j^2/2} + \frac{\exp^{-sd(p_{i^*j} - \xi_j, p_{i^*j})}}{(s+1)\xi_j^2} + \frac{1}{\exp^{s\xi_j^2/4} - 1} \right). \quad \square$$

**Lemma 6.** For any  $x_j > p_{i^*j}$ ,

$$\sum_{t=1}^T \mathbb{P} \left\{ \hat{p}_{i^*j}^{(t)} > x_j \right\} \leq \frac{1}{d(x_j, p_{i^*j})}.$$

*Proof.* Let  $s_m$  denote the time step at which the outputs of arm  $i^*$  and  $j$  is observed for the  $m^{\text{th}}$  time for  $m \geq 1$ , and let  $s_0 = 0$ . Note that probability  $\mathbb{P} \left\{ \hat{p}_{i^*j}^{(t)} > x_j \right\}$  changes when the outputs from both arm  $i^*$  and  $j$  are observed. Hence, we have

$$\begin{aligned} \sum_{t=1}^T \mathbb{P} \left\{ \hat{p}_{i^*j}^{(t)} > x_j \right\} &\leq \sum_{m=0}^{T-1} \mathbb{P} \left\{ \hat{p}_{i^*j}(s_{m+1}) > x_j \right\} \\ &= \sum_{m=0}^{T-1} \mathbb{P} \left\{ \hat{p}_{i^*j}(s_{m+1}) - p_{i^*j} > x_j - p_{i^*j} \right\} \\ &\leq \sum_{m=0}^{T-1} \exp^{-kd(p_{i^*j} + x_j - p_{i^*j}, p_{i^*j})} \quad (\text{using Fact 2}) \end{aligned}$$

$$= \sum_{m=0}^{T-1} \exp^{-kd(x_j, p_{i^*j})}.$$

Using  $\sum_{s \geq 0} \exp^{-sa} \leq 1/a$ , we get

$$\sum_{t=1}^T \mathbb{P} \left\{ \hat{p}_{i^*j}^{(t)} > x_j \right\} \leq \frac{1}{d(x_j, p_{i^*j})}. \quad \square$$

**Lemma 7.** *Let  $P \in \mathcal{P}_{\text{WD}}$ . For any  $\varepsilon > 0$  and  $j > i^*$ ,*

$$\sum_{t=1}^T \mathbb{P} \{j \succ_t i^*, j > i^*\} \leq (1 + \varepsilon) \frac{\ln T}{d(p_{i^*j}, p_{i^*j} + \xi_j)} + O\left(\frac{1}{\varepsilon^2}\right).$$

*Proof.* Let  $p_{i^*j} < x_j < y_j < p_{i^*j} + \xi_j$  for any  $j > i^*$ . Then,

$$\begin{aligned} \sum_{t=1}^T \mathbb{P} \{j \succ_t i^*, j > i^*\} &= \sum_{t=1}^T \mathbb{P} \left\{ \tilde{p}_{i^*j}^{(t)} > p_{i^*j} + \xi_j \right\} \\ &\leq \sum_{t=1}^T \mathbb{P} \left\{ \tilde{p}_{i^*j}^{(t)} > y_j \right\} \\ &\leq \sum_{t=1}^T \mathbb{P} \left\{ \hat{p}_{i^*j}^{(t)} \leq x_j, \tilde{p}_{i^*j}^{(t)} > y_j \right\} + \sum_{t=1}^T \mathbb{P} \left\{ \hat{p}_{i^*j}^{(t)} > x_j \right\}. \end{aligned}$$

Using Lemma 6 and Lemma 5, we have

$$\sum_{t=1}^T \mathbb{P} \{j \succ_t i^*, j > i^*\} \leq \frac{\ln T}{d(x_j, y_j)} + 1 + \frac{1}{d(x_j, p_{i^*j})}.$$

For  $\varepsilon \in (0, 1)$ , we set  $x_j \in (p_{i^*j}, p_{i^*j} + \xi_j)$  such that  $d(x_j, p_{i^*j} + \xi_j) = d(p_{i^*j}, p_{i^*j} + \xi_j)/(1 + \varepsilon)$ , and set  $y_j \in (x_j, p_{i^*j} + \xi_j)$  such that  $d(x_j, y_j) = d(x_j, p_{i^*j} + \xi_j)/(1 + \varepsilon) = d(p_{i^*j}, p_{i^*j} + \xi_j)/(1 + \varepsilon)^2$ . Then this gives

$$\frac{\ln(T)}{d(x_j, y_j)} = (1 + \varepsilon)^2 \frac{\ln(T)}{d(p_{i^*j}, p_{i^*j} + \xi_j)}.$$

Using Fact 5, if  $\varepsilon \in (0, 1)$ ,  $x_j \in (p_{i^*j}, p_{i^*j} + \xi_j)$ , and  $d(x_j, p_{i^*j} + \xi_j) = d(p_{i^*j}, p_{i^*j} + \xi_j)/(1 + \varepsilon)$  then

$$x_j - p_{i^*j} \geq \frac{\varepsilon}{1 + \varepsilon} \cdot \frac{d(p_{i^*j}, p_{i^*j} + \xi_j)}{\ln \left( \frac{(p_{i^*j} + \xi_j)(1 - p_{i^*j})}{p_{i^*j}(1 - p_{i^*j} - \xi_j)} \right)}.$$

Using Pinsker's Inequality (Fact 3),  $1/d(x_j, p_{i^*j}) \leq 1/2(x_j - p_{i^*j})^2 = O(1/\varepsilon^2)$  where big-Oh is hiding functions of the  $p_{i^*j}$  and  $\xi_j$ ,

$$\sum_{t=1}^T \mathbb{P} \{j \succ_t i^*, j > i^*\} \leq (1 + \varepsilon)^2 \frac{\ln(T)}{d(p_{i^*j}, p_{i^*j} + \xi_j)} + O\left(\frac{1}{\varepsilon^2}\right)$$

$$\begin{aligned} &\leq (1 + 3\varepsilon) \frac{\ln(T)}{d(p_{i^*j}, p_{i^*j} + \xi_j)} + O\left(\frac{1}{\varepsilon^2}\right) \\ &\leq (1 + \varepsilon') \frac{\ln(T)}{d(p_{i^*j}, p_{i^*j} + \xi_j)} + O\left(\frac{1}{\varepsilon'^2}\right), \end{aligned}$$

where  $\varepsilon' = 3\varepsilon$  and the big-Oh above hides  $p_{i^*j}$  and  $\xi_j$  in addition to the absolute constants. Replacing  $\varepsilon$  by  $\varepsilon'$  completes the proof.  $\square$

**Theorem 1** (Problem Dependent Bound). *Let  $P \in \mathcal{P}_{\text{WD}}$  and satisfies the transitivity property. If  $\varepsilon > 0$  then, the expected regret of **USS-TS** in  $T$  rounds is bounded by*

$$\mathfrak{R}_T \leq \sum_{j > i^*} \frac{(1 + \varepsilon) \ln T}{d(p_{i^*j}, p_{i^*j} + \xi_j)} \Delta_j + O\left(\frac{K - i^*}{\varepsilon^2}\right),$$

*Proof.* Let  $M_j(T)$  is the number of times arm  $j$  is selected by **USS-TS**. Then, the regret is

$$\begin{aligned} \mathfrak{R}_T &= \sum_{j \in [K]} \mathbb{E}[M_j(T)] \Delta_j = \sum_{j \in [K]} \mathbb{E} \left[ \sum_{t=1}^T \mathbb{1}_{\{I_t=j\}} \right] \Delta_j \\ &= \sum_{j \in [K]} \sum_{t=1}^T \mathbb{E}[\mathbb{1}_{\{I_t=j\}}] \Delta_j = \sum_{j \in [K]} \sum_{t=1}^T \mathbb{P}\{I_t = j\} \Delta_j \\ &= \sum_{j \in [K]} \sum_{t=1}^T \mathbb{P}\{I_t = j, j \neq i^*\} \Delta_j \\ \implies \mathfrak{R}_T &= \sum_{j < i^*} \sum_{t=1}^T \mathbb{P}\{I_t = j, j < i^*\} \Delta_j + \sum_{j > i^*} \sum_{t=1}^T \mathbb{P}\{I_t = j, j > i^*\} \Delta_j \end{aligned} \quad (15)$$

First, we bound the first of term of summation. From Lemma 4, we have

$$\sum_{t=1}^T \mathbb{P}\{I_t = j, j < i^*\} \leq \frac{24}{\xi_j^2} + \sum_{s \geq 8/\xi_j} \Theta \left( \exp^{-s\xi_j^2/2} + \frac{\exp^{-sd(p_{i^*j} - \xi_j, p_{i^*j})}}{(s+1)\xi_j^2} + \frac{1}{\exp^{s\xi_j^2/4} - 1} \right).$$

Using  $\sum_{s \geq 0} \exp^{-sa} \leq 1/a$ ,  $d(p_{i^*j} - \xi_j, p_{i^*j}) \leq 2\xi_j^2$  (Fact 3), and Fact 4, we have

$$\sum_{t=1}^T \mathbb{P}\{I_t = j, j < i^*\} \leq \frac{24}{\xi_j^2} + \Theta \left( \frac{1}{\xi_j^2} + \frac{1}{\xi_j^4} + \left( \frac{1}{\xi_j^4} + \frac{1}{\xi_j^2} \right) \right) \leq O(1). \quad (16)$$

If arm  $I_t > i^*$  is selected then there exists at least one arm  $k_1 > i^*$  which must be preferred over  $i^*$ . If the index of arm  $k_1$  is smaller than the selected arm, then there must be an arm  $k_2 > k_1$ , which must be preferred over  $k_1$ . By transitivity property, arm  $k_2$  is also preferred over  $i^*$ . If the index of arm  $k_2$  is still smaller of the selected arm, we can repeat the same argument. Eventually, we can find an arm  $k'$  whose index is larger than the selected arm, and it is preferred over arm  $k_i, \dots, k_1, i^*$ . Note that the selected arm must be preferred over  $k'$ ; hence the selected arm is also preferred over  $i^*$ . We can write it as follows:

$$\sum_{t=1}^T \mathbb{P}\{I_t = j, j > i^*\} \Delta_j = \sum_{t=1}^T \mathbb{P}\{I_t = j, j > i^*, k' \succ_t k, k \succ_t i^*, k' > j, k > i^*\} \Delta_j$$

$$\begin{aligned}
 &= \sum_{t=1}^T \mathbb{P} \{I_t = j, j > i^*, k' \succ_t i^*, k' > j\} \Delta_j \quad (\text{Definition 5}) \\
 &= \sum_{t=1}^T \mathbb{P} \{j \succ_t k, \forall k > j, j > i^*, k' \succ_t i^*, k' > j\} \Delta_j \quad (\text{Lemma 1}) \\
 &= \sum_{t=1}^T \mathbb{P} \{j \succ_t k, \forall k > j, j > i^*, j \succ_t i^*\} \Delta_j \quad (\text{Definition 5}) \\
 \implies \sum_{t=1}^T \mathbb{P} \{I_t = j, j > i^*\} \Delta_j &\leq \sum_{t=1}^T \mathbb{P} \{j \succ_t i^*, j > i^*\} \Delta_j. \tag{17}
 \end{aligned}$$

Using Lemma 7 to upper bound  $\sum_{t=1}^T \mathbb{P} \{j \succ_t i^*, j > i^*\} \Delta_j$  and with Eq. (16), we get

$$\begin{aligned}
 \mathfrak{R}_T &\leq O(1) + \sum_{j > i^*} \left( (1 + \varepsilon) \frac{\ln(T)}{d(p_{i^*j}, p_{i^*j} + \xi_j)} + O\left(\frac{1}{\varepsilon^2}\right) \right) \Delta_j \\
 \implies \mathfrak{R}_T &\leq \sum_{j > i^*} \frac{(1 + \varepsilon) \ln(T)}{d(p_{i^*j}, p_{i^*j} + \xi_j)} \Delta_j + O\left(\frac{K - i^*}{\varepsilon^2}\right). \quad \square
 \end{aligned}$$

**Theorem 2** (Problem Independent Bound). *Let  $P \in \mathcal{P}_{\text{WD}}$  and satisfies the transitivity property. Then the expected regret of **USS-TS** in  $T$  rounds*

- for any instance in  $\mathcal{P}_{\text{SD}}$  is bounded as

$$\mathfrak{R}_T \leq O\left(\sqrt{KT \ln T}\right).$$

- for any instance in  $\mathcal{P}_{\text{WD}}$  is bounded as

$$\mathfrak{R}_T \leq O\left((K \ln T)^{1/3} T^{2/3}\right).$$

*Proof.* Let  $M_j(T)$  is the number of times arm  $j$  preferred over the optimal arm in  $T$  rounds. From Lemma 4, for any  $j < i^*$ , we have

$$\begin{aligned}
 \mathbb{E}[M_j(T)] &= \sum_{t=1}^T \mathbb{P} \{I_t = j, j < i^*\} \\
 &\leq \frac{24}{\xi_j^2} + \sum_{s \geq 8/\xi_j} \Theta \left( \exp^{-s\xi_j^2/2} + \frac{\exp^{-sd(p_{i^*j} - \xi_j, p_{i^*j})}}{(s+1)\xi_j^2} + \frac{1}{\exp^{s\xi_j^2/4} - 1} \right).
 \end{aligned}$$

It is east to show that  $\frac{\exp^{-sd(p_{i^*j} - \xi_j, p_{i^*j})}}{(s+1)\xi_j^2} \leq \frac{1}{(s+1)\xi_j^2}$  and  $\exp^{s\xi_j^2/4} - 1 \geq s\xi_j^2/4$  (as  $\exp^y \geq y + 1$ ),

$$\mathbb{E}[M_j(T)] \leq \frac{24}{\xi_j^2} + \sum_{s \geq 8/\xi_j} \Theta \left( \frac{1}{\xi_j^2} + \frac{1}{(s+1)\xi_j^2} + \frac{4}{s\xi_j^2} \right).$$

By using  $\sum_{s \geq 0} \exp^{-sa} \leq 1/a$  and  $\sum_{s=1}^T (1/s) = \log T$ ,

$$\mathbb{E}[M_j(T)] \leq \frac{24}{\xi_j^2} + \Theta\left(\frac{1}{\xi_j^2} + \frac{\ln T}{\xi_j^2}\right) \implies \mathbb{E}[M_j(T)] \leq O\left(\frac{\ln T}{\xi_j^2}\right). \quad (18)$$

For any  $j > i^*$ , using Lemma 5 and Lemma 6 with Eq. (17), we have

$$\mathbb{E}[M_j(T)] = \sum_{t=1}^T \mathbb{P}\{I_t = j, j > i^*\} \leq \sum_{t=1}^T \mathbb{P}\{j \succ_t i^*, j > i^*\} \leq \frac{\ln T}{d(x_j, y_j)} + 1 + \frac{1}{d(x_j, p_{i^*j})}.$$

By setting  $x_j = p_{i^*j} + \frac{\xi_j}{3}$  and  $y_j = p_{i^*j} + \frac{2\xi_j}{3}$ , we have  $d(x_j, y_j) \geq \frac{2\xi_j^2}{9}$  and  $d(x_j, p_{i^*j}) \geq \frac{2\xi_j^2}{9}$  (using Fact 3).

$$\begin{aligned} \mathbb{E}[M_j(T)] &\leq \frac{9 \ln T}{2\xi_j^2} + 1 + \frac{9}{2\xi_j^2} \\ \implies \mathbb{E}[M_j(T)] &\leq O\left(\frac{\ln T}{\xi_j^2}\right). \end{aligned} \quad (19)$$

The regret of **USS-TS** is given by

$$\mathfrak{R}_T = \sum_{j \neq i^*} \mathbb{E}[M_j(T)] \Delta_j = \sum_{j < i^*} \mathbb{E}[M_j(T)] \Delta_j + \sum_{j > i^*} \mathbb{E}[M_j(T)] \Delta_j$$

Recall  $\Delta_j = C_j + \gamma_j - (C_{i^*} + \gamma_{i^*})$  and for any two arms  $i$  and  $j$ ,  $0 \leq p_{ij} - (\gamma_j - \gamma_{i^*}) \leq \beta$ . By using Eq. (8a) for  $j < i^*$ , we have  $\Delta_j = \xi_j - (p_{i^*j} - (\gamma_{i^*} - \gamma_j)) \implies \Delta_j \leq \xi_j$ , and using Eq. (8b) for  $j > i^*$ , we have  $\Delta_j = \xi_j + (p_{i^*j} - (\gamma_{i^*} - \gamma_j)) \implies \Delta_j \leq \xi_j + \beta$ . Replacing  $\Delta_j$ ,

$$\Rightarrow \mathfrak{R}_T \leq \sum_{j < i^*} \mathbb{E}[M_j(T)] \xi_j + \sum_{j > i^*} \mathbb{E}[M_j(T)] (\xi_j + \beta).$$

Let  $0 < \xi' < 1$ . Then  $\mathfrak{R}_T$  can be written as:

$$\begin{aligned} \mathfrak{R}_T &\leq \sum_{\substack{\xi' > \xi_j \\ j < i^*}} \mathbb{E}[M_j(T)] \xi_j + \sum_{\substack{\xi' < \xi_j \\ j < i^*}} \mathbb{E}[M_j(T)] \xi_j \\ &\quad + \sum_{\substack{\xi' > \xi_j \\ j > i^*}} \mathbb{E}[M_j(T)] (\xi_j + \beta) + \sum_{\substack{\xi' < \xi_j \\ j > i^*}} \mathbb{E}[M_j(T)] (\xi_j + \beta). \end{aligned}$$

Using  $\sum_{\xi' > \xi_j} \mathbb{E}[M_j(T)] \leq T$  for any  $j$  such that  $\xi' > \xi_j$ ,

$$\mathfrak{R}_T \leq T\xi' + \sum_{\substack{\xi' < \xi_j \\ j < i^*}} \mathbb{E}[M_j(T)] \xi_j + \sum_{\substack{\xi' < \xi_j \\ j > i^*}} \mathbb{E}[M_j(T)] (\xi_j + \beta).$$



Substituting the value of  $\mathfrak{R}_T$  from Eq. (18) and Eq. (19),

$$\begin{aligned}
 \mathfrak{R}_T &\leq T\xi' + \sum_{\substack{\xi' < \xi_j \\ j < i^*}} O\left(\frac{\xi_j \ln T}{\xi_j^2}\right) + \sum_{\substack{\xi' < \xi_j \\ j > i^*}} O\left(\frac{(\xi_j + \beta) \ln T}{\xi_j^2}\right) \\
 &\leq T\xi' + \sum_{\substack{\xi' < \xi_j \\ j < i^*}} O\left(\frac{\ln T}{\xi_j}\right) + \sum_{\substack{\xi' < \xi_j \\ j > i^*}} O\left(\frac{\ln T}{\xi_j} + \frac{\beta \ln T}{\xi_j^2}\right) \\
 &\leq T\xi' + O\left(\frac{K \ln T}{\xi'}\right) + O\left(\frac{K \ln T}{\xi'} + \frac{\beta K \ln T}{\xi'^2}\right) \\
 &= T\xi' + O\left(K \ln T \left(\frac{1}{\xi'} + \frac{\beta}{\xi'^2}\right)\right)
 \end{aligned}$$

Let there exist a variable  $\alpha$  such that  $O\left(K \ln T \left(\frac{1}{\xi'} + \frac{\beta}{\xi'^2}\right)\right) \leq \alpha K \ln T \left(\frac{1}{\xi'} + \frac{\beta}{\xi'^2}\right)$ ,

$$\implies \mathfrak{R}_T \leq T\xi' + \alpha K \ln T \left(\frac{1}{\xi'} + \frac{\beta}{\xi'^2}\right). \quad (20)$$

Consider  $\mathcal{P}_{\text{WD}}$  class of problems. As  $\xi' < 1$  and  $\beta \leq 2$  (as arms in the cascade may not be ordered by their error-rates, it is possible that  $\gamma_i < \gamma_j$ ), we have  $\left(\frac{1}{\xi'} + \frac{\beta}{\xi'^2}\right) \leq \frac{\beta+1}{\xi'^2} \leq \frac{3}{\xi'^2}$ ,

$$\mathfrak{R}_T \leq T\xi' + \frac{3\alpha K \ln T}{\xi'^2}.$$

Choose  $\xi' = \left(\frac{6\alpha K \ln T}{T}\right)^{1/3}$  which maximize above upper bound and we get,

$$\begin{aligned}
 \mathfrak{R}_T &\leq (6\alpha K \ln T)^{1/3} T^{2/3} + \frac{(6\alpha K \ln T)^{1/3}}{2} T^{2/3} \\
 \implies \mathfrak{R}_T &\leq 2(6\alpha K \ln T)^{1/3} T^{2/3} = O\left((K \ln T)^{1/3} T^{2/3}\right)
 \end{aligned}$$

It completes our proof for the case when any problem instance belongs to  $\mathcal{P}_{\text{WD}}$ .

Now we consider any problem instance  $\theta \in \mathcal{P}_{\text{SD}}$ . For any  $\theta \in \mathcal{P}_{\text{SD}} \implies \forall j \in [K], p_{ij} = \gamma_i - \gamma_j \implies \beta = 0$  (Setting  $\mathbb{P}\{Y^i = Y, Y^j \neq Y\} = 0$  for  $j > i$  in Proposition 3 of Hanawal et al. (2017)). We can rewrite Eq. (20) as

$$\mathfrak{R}_T \leq T\xi' + \frac{\alpha K \ln T}{\xi'}.$$

Choose  $\xi' = \left(\frac{\alpha K \ln T}{T}\right)^{1/2}$  which maximize above upper bound and we get,

$$\implies \mathfrak{R}_T \leq 2(\alpha K T \ln T)^{1/2} = O\left(\sqrt{KT \ln T}\right)$$

This complete proof for second part of Theorem 2.  $\square$
